# Supplementary material for: Synthesis and biological activity evaluation of 20-epi-salinomycin and its 20-O-acyl derivatives
Source: Royal Society of Chemistry journal article supplement (doi:10.1039/c6ra08967d), 2016-01-01
Supplement: c6ra08967d1.pdf [file c6ra08967d1.pdf]

## Synthesis and biological activities evaluation of 20-epi-salinomycin and its 20-O-acyl derivatives

Wenxuan Zhang,<sup>a</sup> Jun Wu,<sup>b</sup> Bo Li,<sup>a</sup> Jie Xia,<sup>a</sup> Hongna Wu,<sup>a</sup> Liu Wang,<sup>b</sup> Jie Hao,<sup>b</sup> Qi Zhou,<sup>b</sup> Song Wu,<sup>a\*</sup>

*a.State Key Laboratory of Bioactive Substance and Function of Natural Medicines, Institute of Materia Medica,*

*Peking Union Medical College and Chinese Academy of Medical Sciences, Beijing 100050, China,*

*b.State Key Laboratory of Reproductive Biology, Institute of Zoology, Chinese Academy of Sciences, Beijing*

*100101, China*

*\*email: [ws@imm.ac.cn](mailto:ws@imm.ac.cn)*

### <sup>1</sup>H and <sup>13</sup>C NMR spectra

<sup>1</sup>H and <sup>13</sup>C NMR spectra were recorded on Varian Mercury 400 MHz, and the data were recorded with CDCl<sub>3</sub> as the solvent. Chemical shifts (δ) were reported in ppm downfield from an internal TMS standard. High-resolution mass spectra were obtained in the ESI mode.

20-epi-O-p-nitrobenzoylated salinomycin TMSEt-ester 5

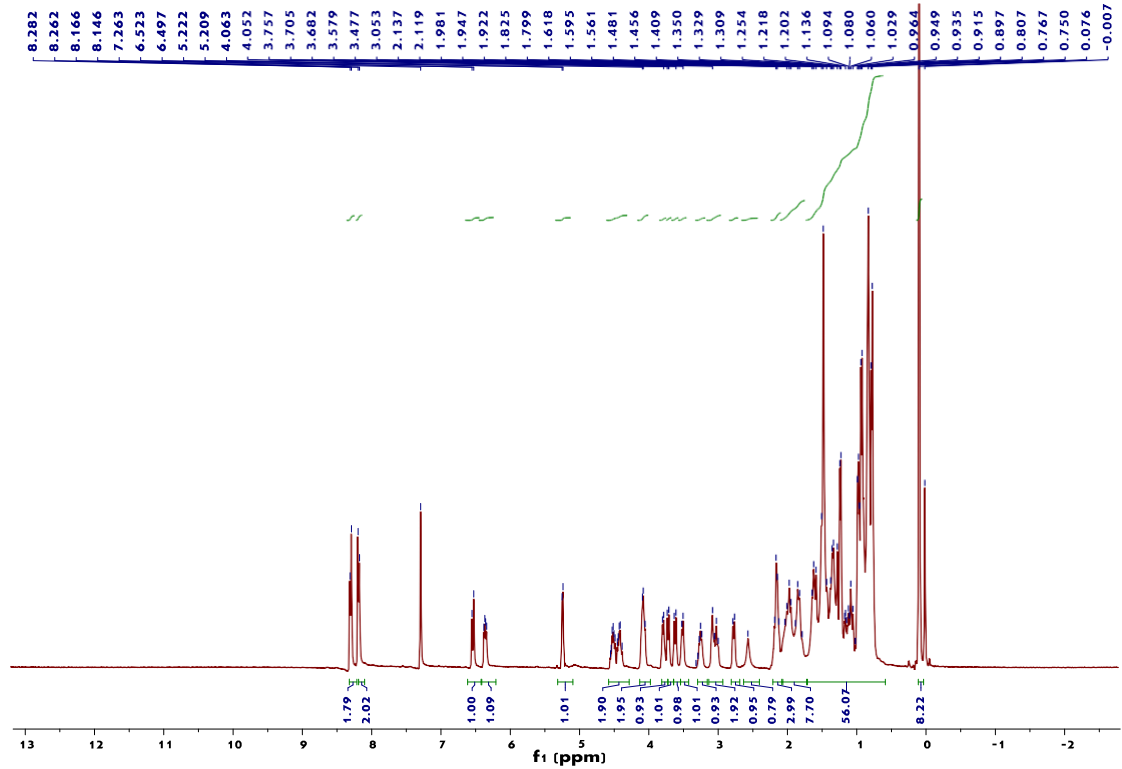

1h20140828N0219C  
Mercury 400MHz 13C NQ2 1h CDCl3

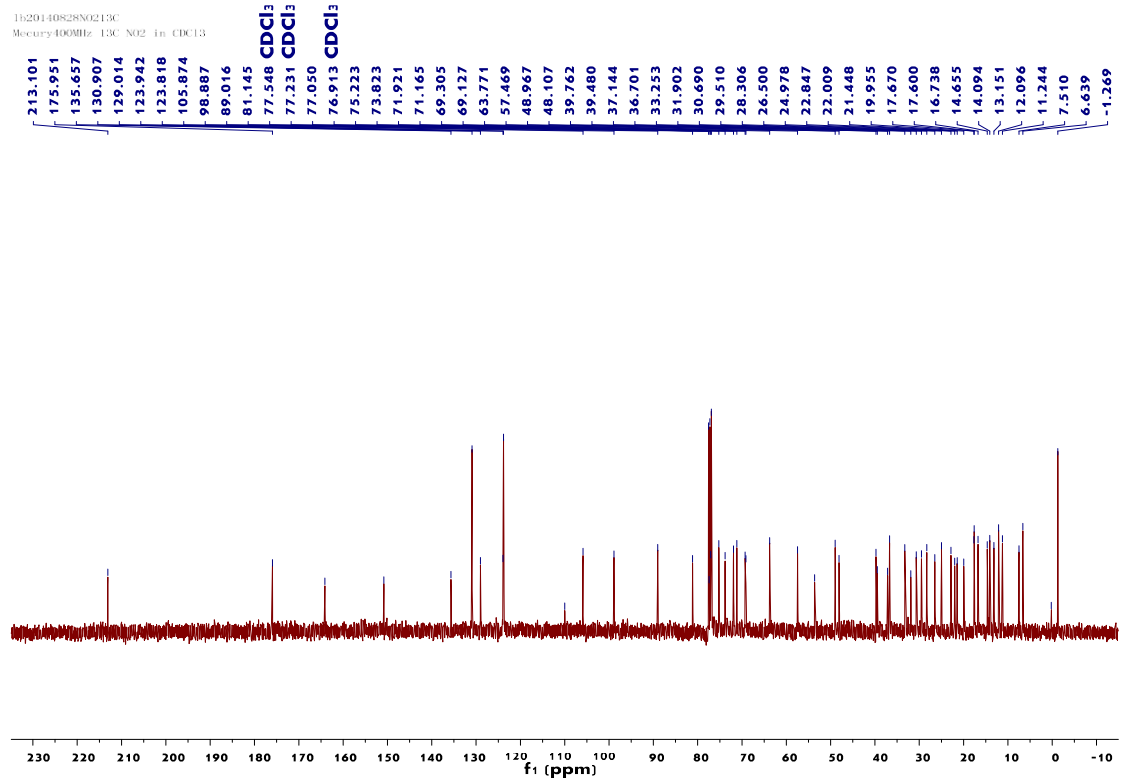

20-*epi*-O-*p*-nitrobenzoylated salinomycin sodium salt 8

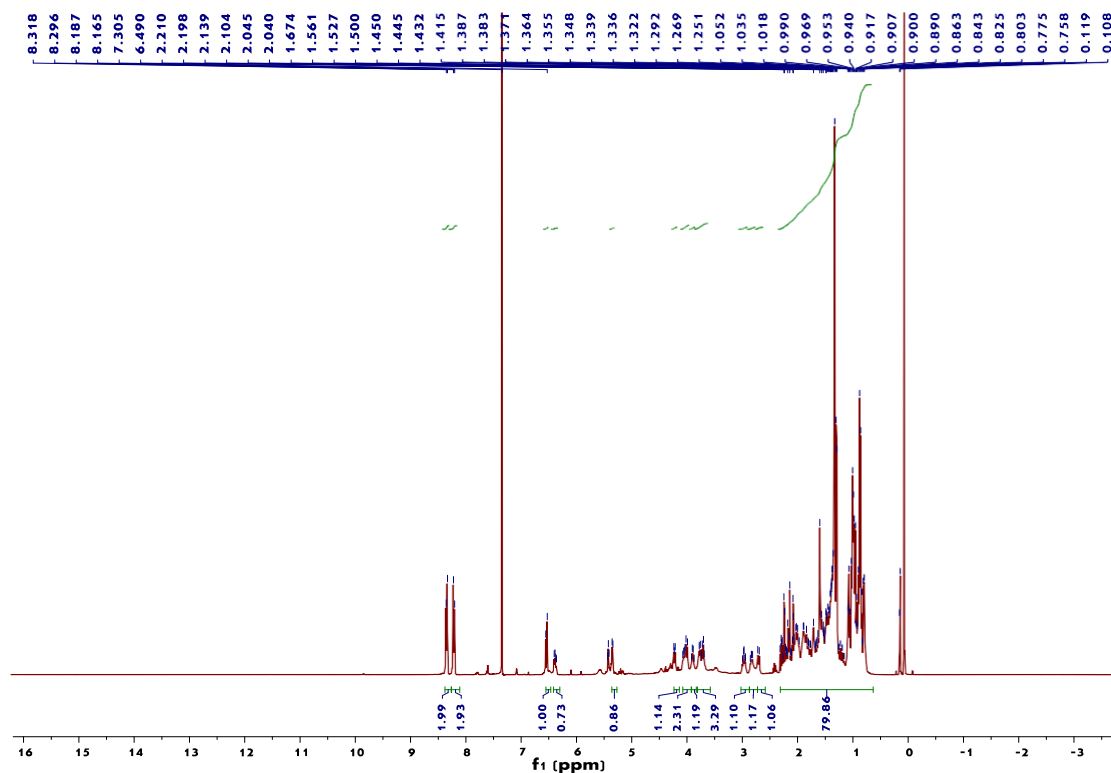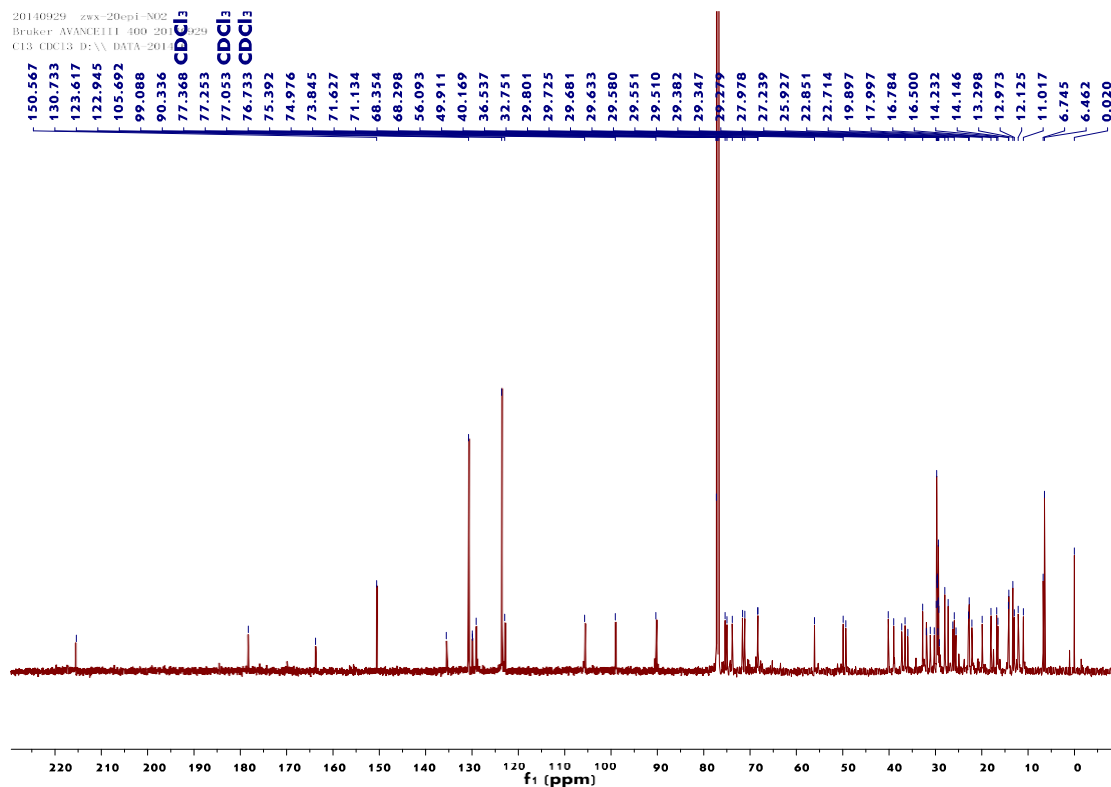

20-*epi*-salinomycin sodium salt 9

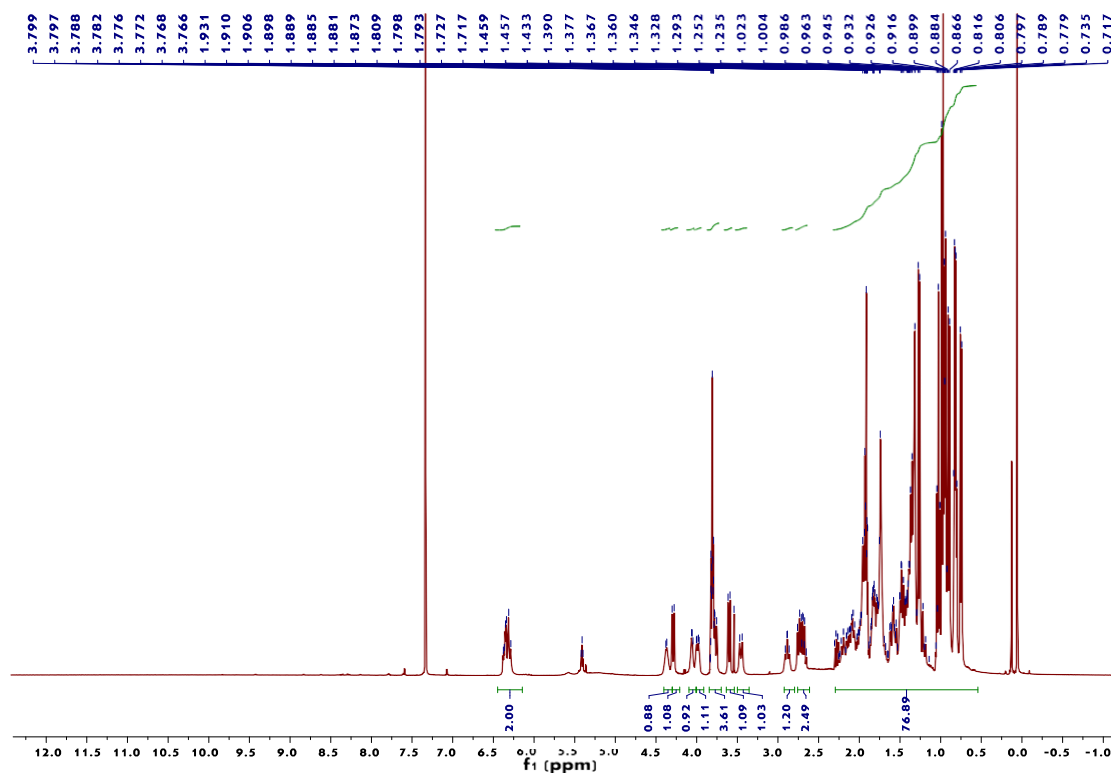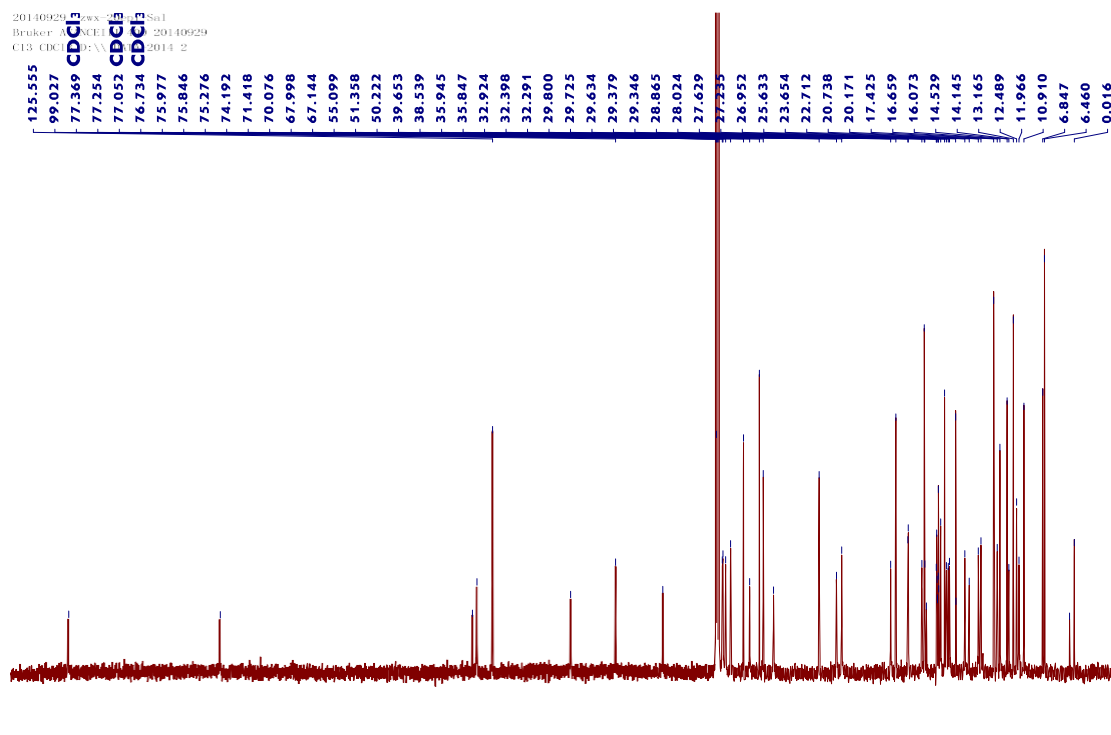

*20-epi-salinomycin sodium salt 9*

220 210 200 190 180 170 160 150 140 130 120 110 100 90 80 70 60 50 40 30 20 10 0  
f1 (ppm)

20-*epi-O*-acetylated salinomycin sodium salt 9a

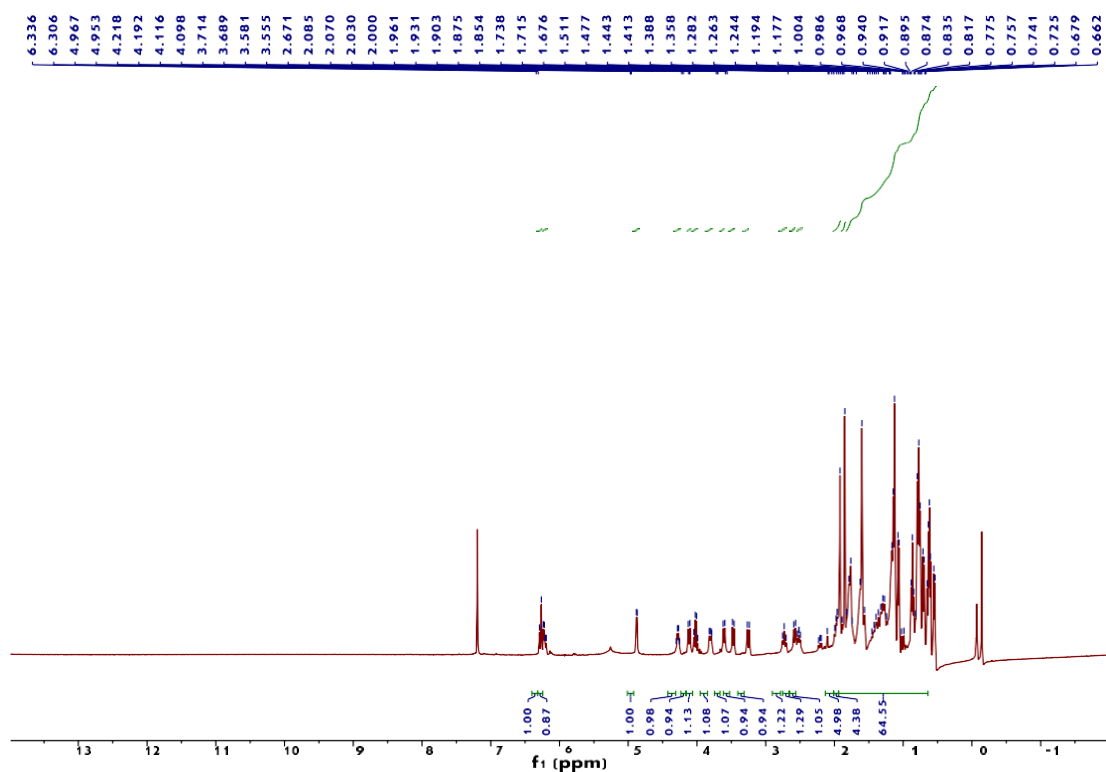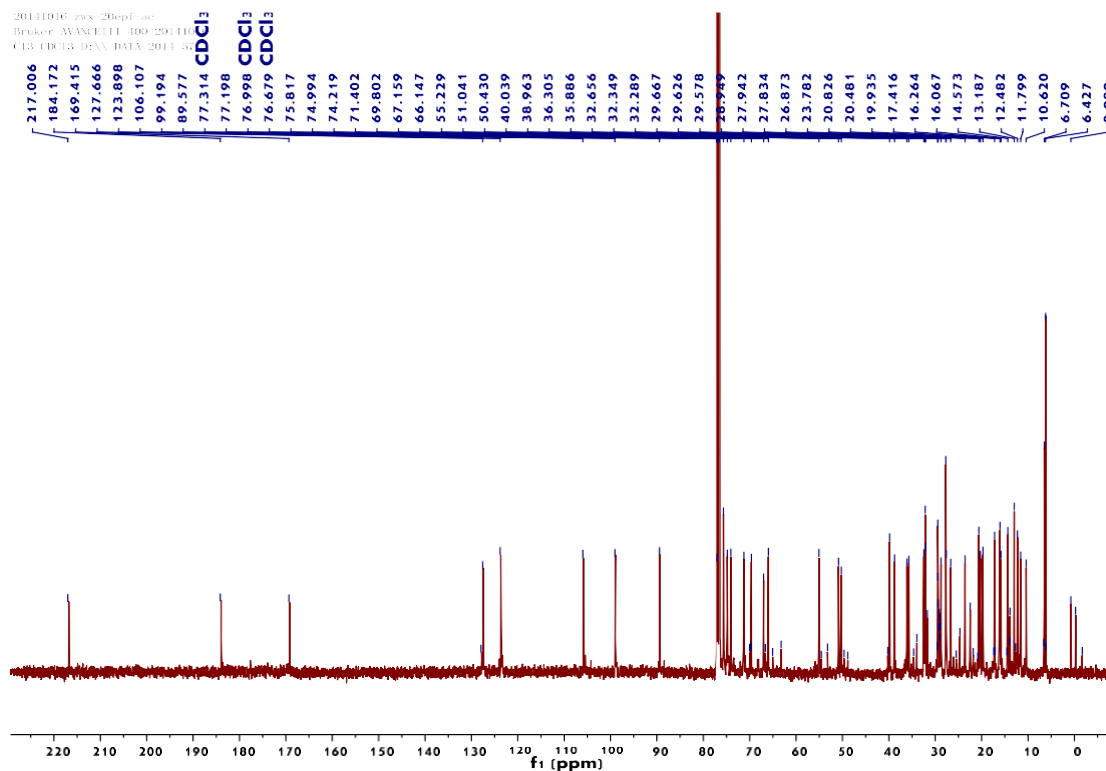

20-*epi*-O-acryl salinomycin sodium salt 9b

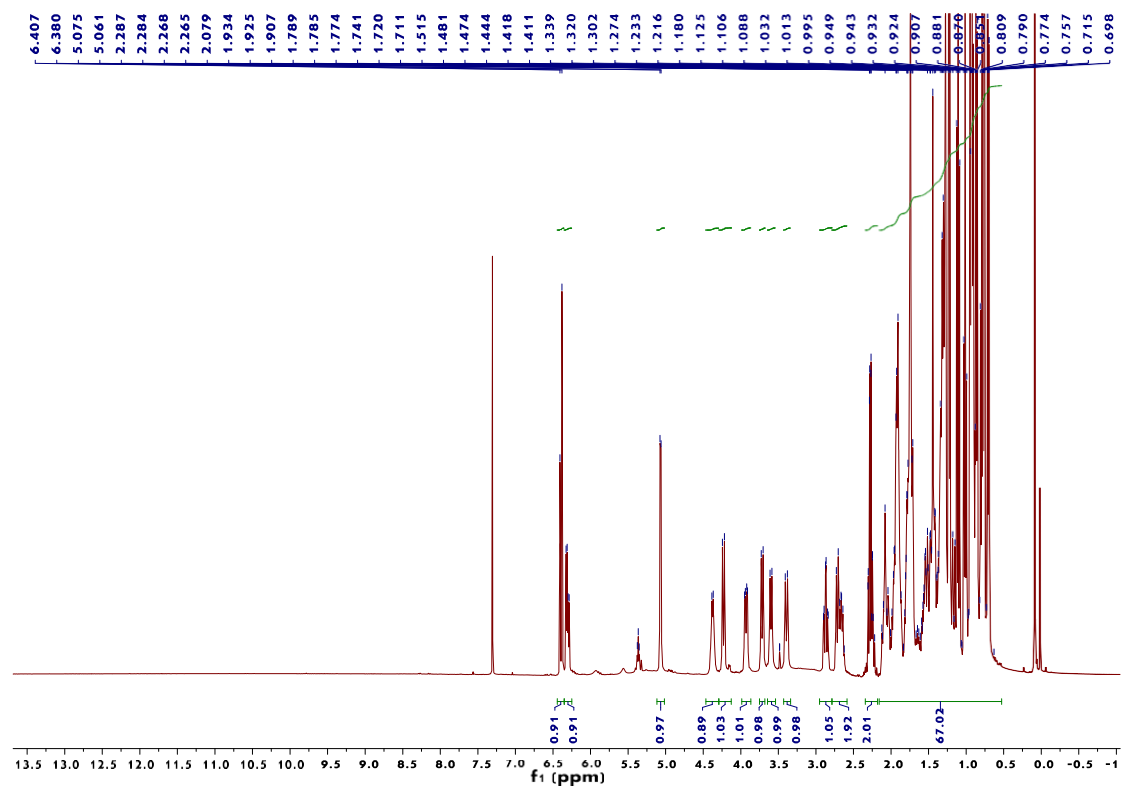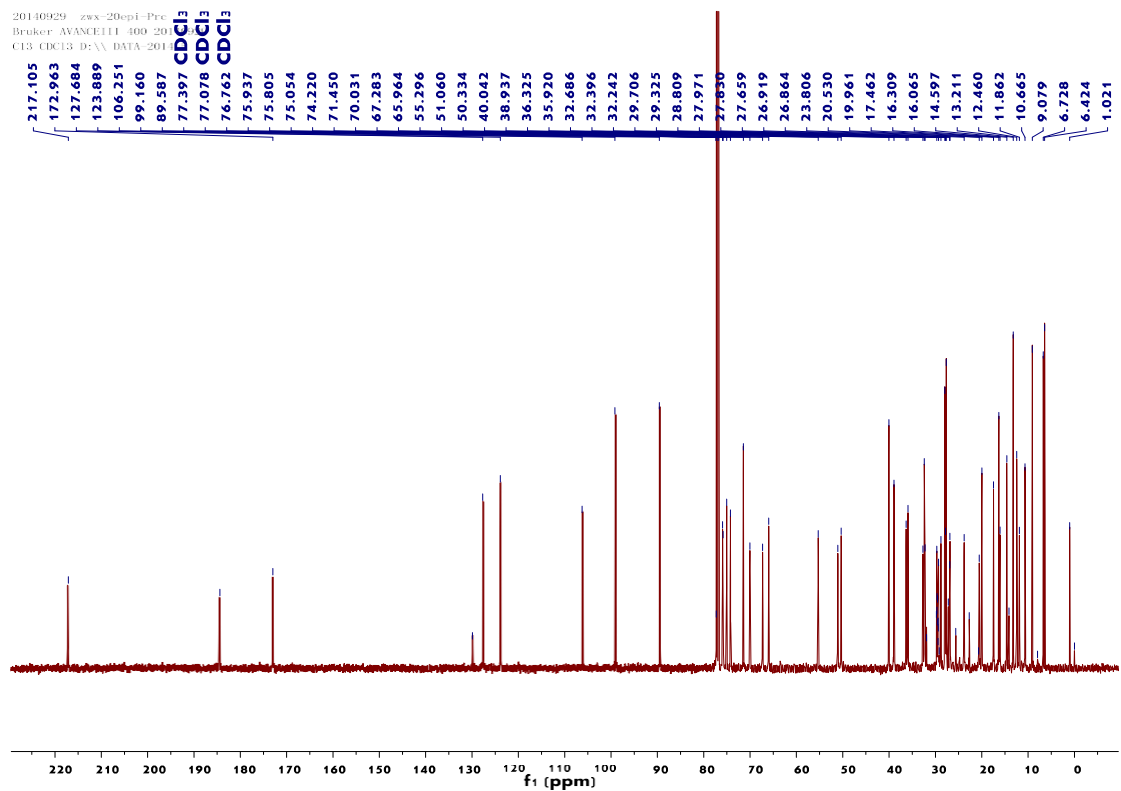

**20-epi-O-isobutyryl salinomycin sodium salt 9c**

1h20140923yidiqingxian  
Mercury400MHz 1H yidiqingxian In CDCl3

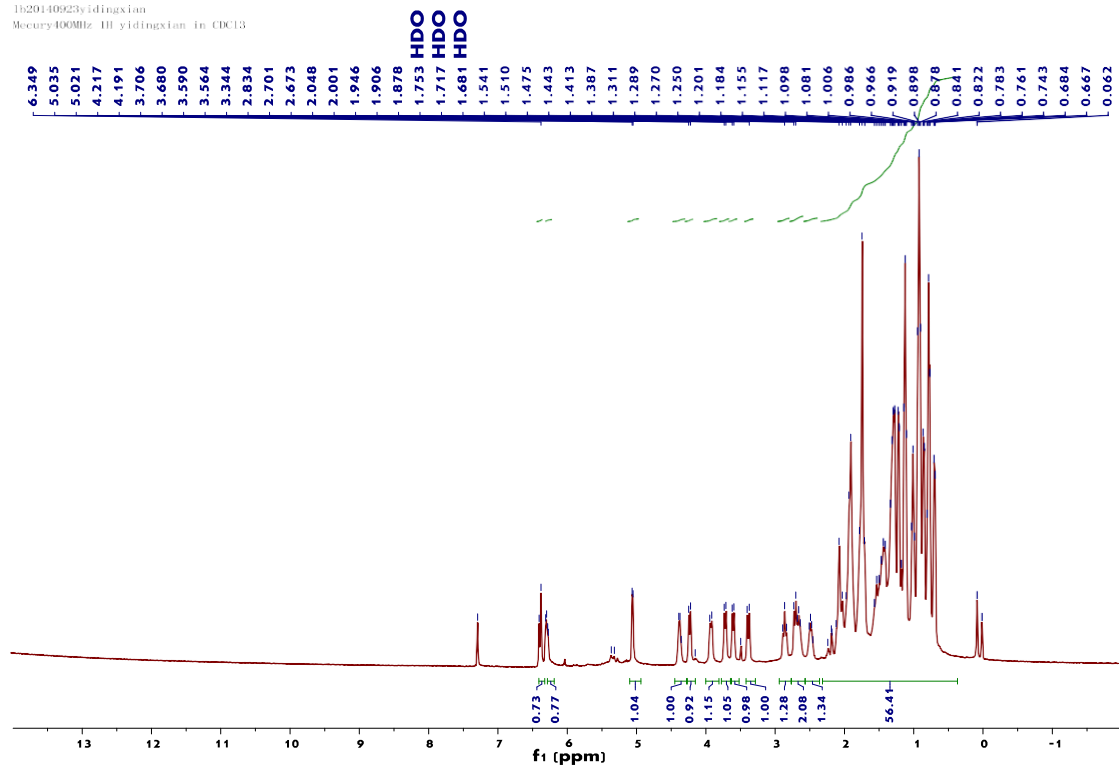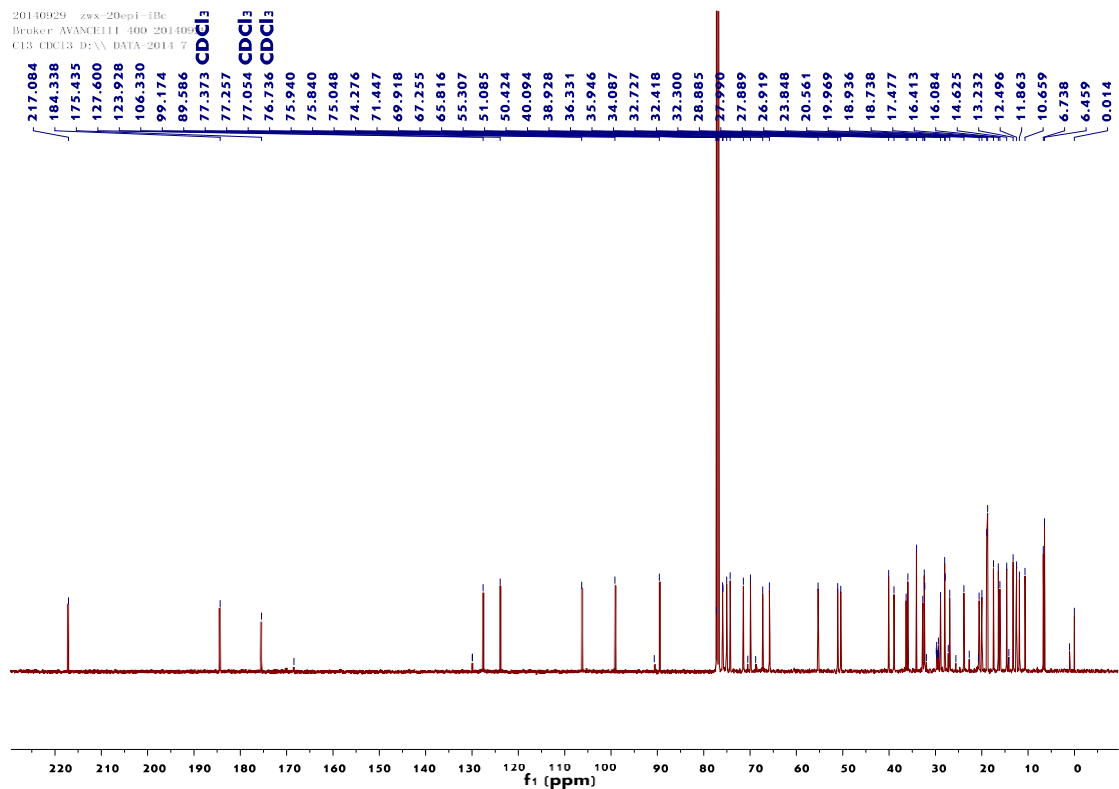



20-epi-O-benzoylated salinomycin sodium salt 9d

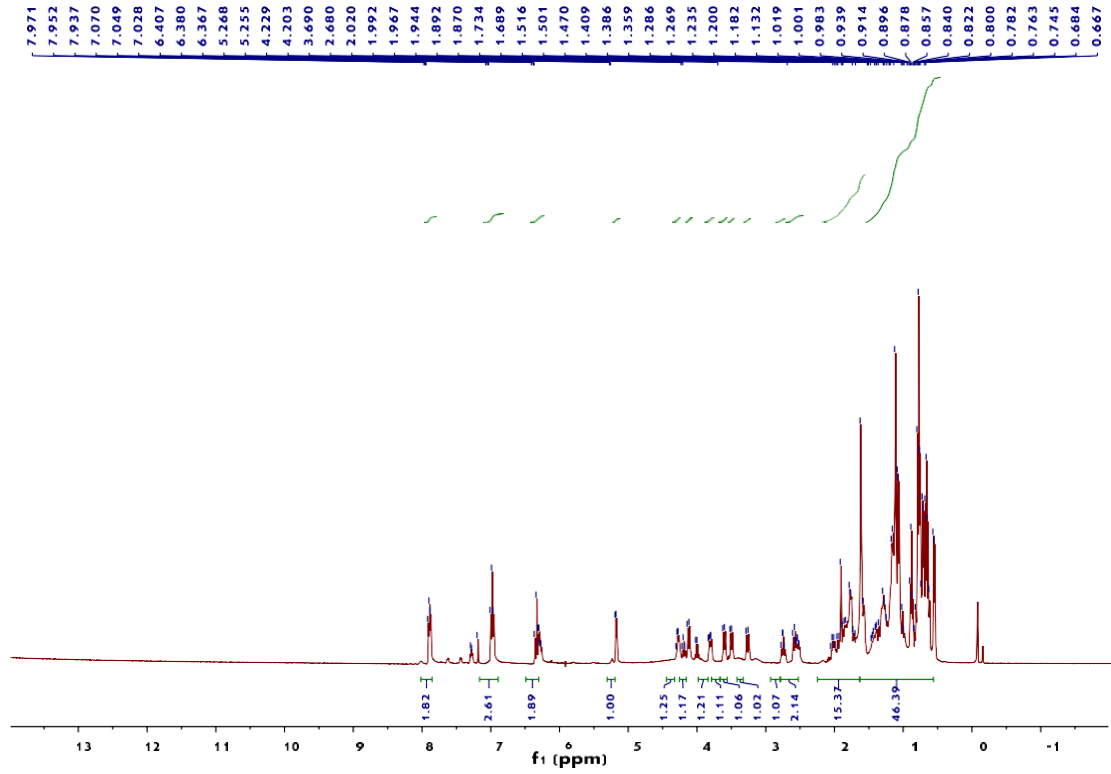

zws-20140911-FBz-C  
mercury-100, zws-20140911-20epi-FBz

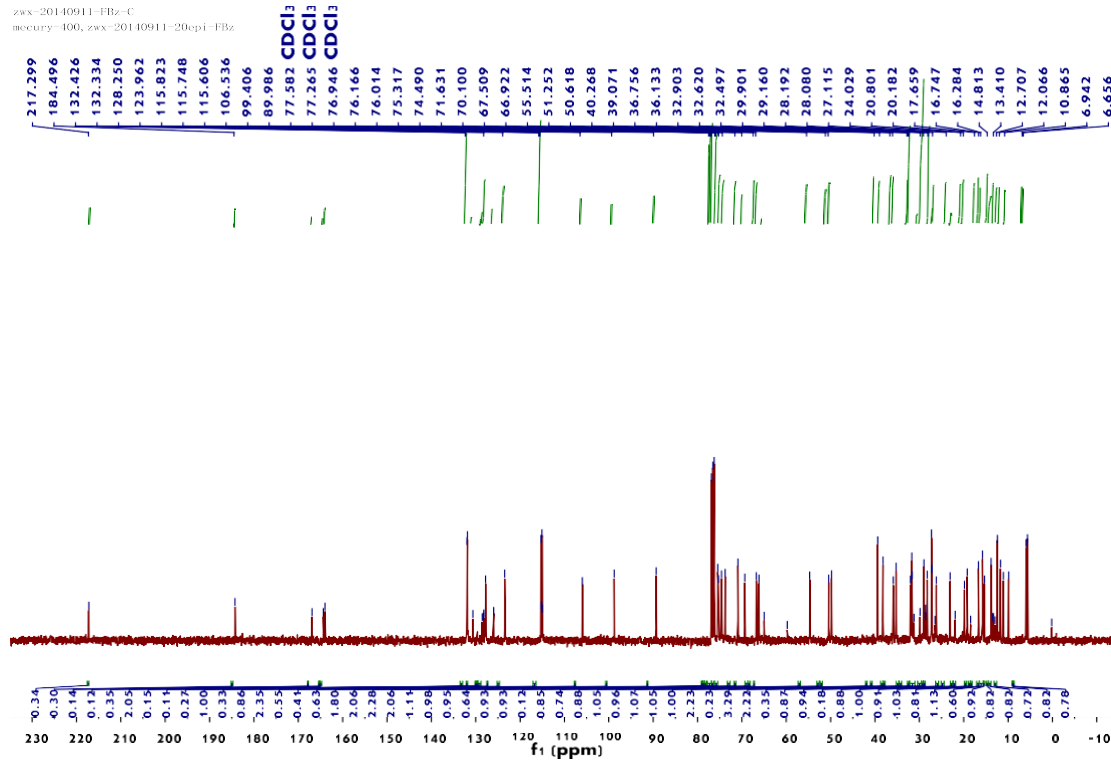

20-*epi*-O-*p*-fluorobenzoylated salinomycin sodium salt 9e

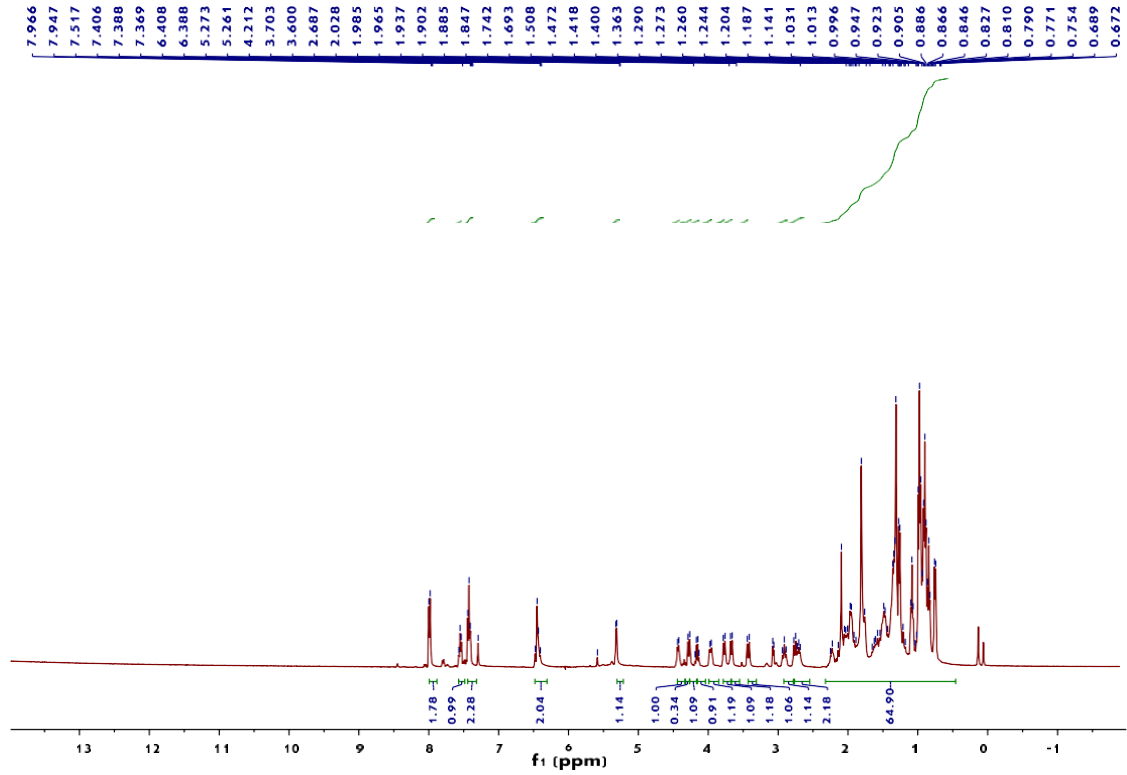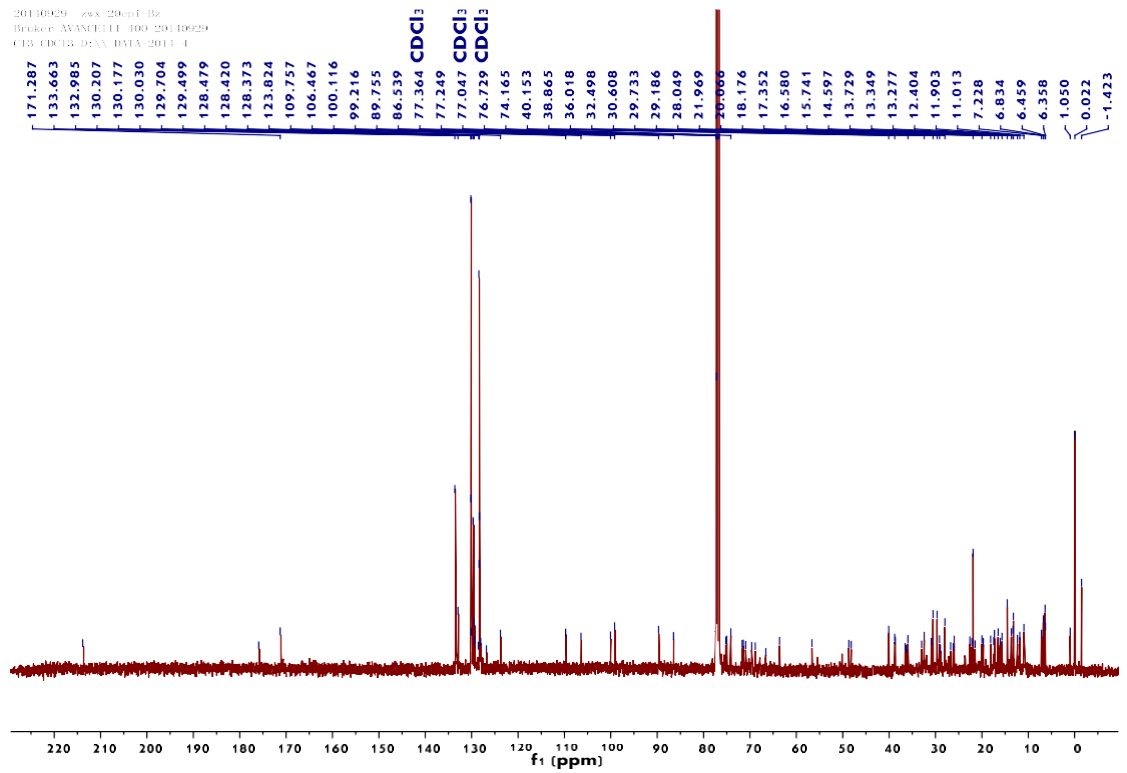

20130929 zwx 20epi-9e  
 Bruker AVANCE III 400 20130929  
 CDCl<sub>3</sub> CDCl<sub>3</sub> D:\DATA\2013\1
